# Supplementary material
Source: HighWire-hosted journal article supplement (https://bmjopen.bmj.com/content/13/5/e066524)
Supplement: inline-supplementary-material-1 [file inline-supplementary-material-1.pdf]

**Table S1. (Supplemental)** Proposed framework for the safer adoption of a MacGyvered device. Adapted from Turner and colleagues.<sup>7</sup>

1. Define the problem and rule out the suitability of existing solutions
2. List benchmark safety indices for the device
3. Seek broader feedback from all stakeholders on the design's utility and potential pitfalls.
4. Perform laboratory-based and in situ simulations.
5. Introduce into low-risk clinical settings after local due process and patient consent.
6. Introduce into higher-risk clinical settings with a discrete group of trained 'super-users'.
7. Encourage an iterative cycle of feedback, review, re-design and improvement.
8. **Do not:** adopt, publish, endorse or disseminate via social media a MacGyvered device without data to support safety.

**Table S2. (Supplemental). Lab-based testing of the Bubble PAPR prior to clinical evaluation**

All of the bench tests detailed below were carried out by the Electrical and Biomedical Engineering (EMBE) team based at Wythenshawe Hospital (MFT), the University of Manchester Mechanical Aerospace and Civil Engineering team (UoM) or by INSPEC International, Salford, UK. A PAPR unit was supplied, and the Instructions for Use were followed by the independent tester, with a judgement made if they fulfilled particular requirements. Some requirements are supplemented by the qualitative or quantitative data collected in the questionnaires. Standards used were British Standard EN12941 (BS, 2008) and the European Regulations for Respiratory Protective Equipment EU2016/425 (ER, 2016).

| Relevant section of standard | Standard detail                      | Test location | Test detail                                                                                                                                              | Results/notes                                                                          | Pass/Fail       |
|------------------------------|--------------------------------------|---------------|----------------------------------------------------------------------------------------------------------------------------------------------------------|----------------------------------------------------------------------------------------|-----------------|
| BS 6.1.1<br>ER 1.3.2         | Suitable resistance to wear and tear | MFT           | PAPR units inspected after 1 week of continual use. Images taken before and after.                                                                       | Opinion. Baseline inspection +/- photograph. Review after 1 week                       | Pass<br>14/3/21 |
| BS 6.1.4<br>ER 1.2.1.2       | No sharp edges                       | MFT           | Visual and physical inspection<br>Reports from staff evaluation                                                                                          | Opinion. Baseline inspection +/- photograph. Review after 1 week                       | Pass<br>14/3/21 |
| BS 6.3.2                     | Fits a range of head sizes           | MFT           | Ten participants will undergo fit testing. These participants will have height, weight and head circumference measured as part of this standard process. | Fit test data shared with EBME team. All fit factors >500 as per BS EN 12941 standard. | Pass<br>25/2/21 |
| BS 6.3.3.1                   | Does not distort vision              | MFT           | The optical area appears transparent.                                                                                                                    | Inspection by EBME team                                                                | Pass<br>25/2/21 |
| BS 6.3.3.2                   | Permits appropriate field of view    | MFT           | Reports from staff evaluation                                                                                                                            | Review of results from initial staff evaluations                                       | Pass<br>14/3/21 |

McGrath et al. Supplemental Tables

| ER2.3                        |                                                                             |               |                                                                                                    |                                                                      |                 |
|------------------------------|-----------------------------------------------------------------------------|---------------|----------------------------------------------------------------------------------------------------|----------------------------------------------------------------------|-----------------|
| Relevant section of standard | Standard detail                                                             | Test location | Test detail                                                                                        | Results/notes                                                        | Pass/Fail       |
| BS 6.9                       | Cannot reverse airflow                                                      | MFT           | Normal use.<br>Simulate blocked filter and blocked air duct.<br>Flowmeter.                         |                                                                      | Pass<br>14/3/21 |
| BS 6.9                       | Battery safe – protection from short circuit                                | MFT           | EBME check on battery packs (suitable for purpose / recommended packs)                             | As per manufacturer documentation. Will not be separately tested.    | Pass<br>25/2/21 |
| ER2.12                       | Appropriate markings                                                        | MFT           | Yoke manufactured with section for appropriate sticker                                             |                                                                      | Pass<br>25/2/21 |
| ER3.10.1                     | Appropriate training provided                                               | MFT           | Instructions for use provided.<br>Training videos provided.                                        | Instructions for Use provided to EBME.<br>Training videos available. | Pass<br>25/2/21 |
| No specific clause           | Cleanable                                                                   | MFT           | Specification of foam material for yoke details cleaning methods, durability and material fatigue. | Specification provided to EBME.                                      | Pass<br>25/2/21 |
| BS 6.16                      | Mass shall not exceed 5kg. A maximum of 1.5kg shall be carried on the head. | MFT           | Weigh the assembled Bubble PAPR                                                                    | Assembled Bubble PAPR<br>Weight = 1.4kg                              | Pass<br>14/3/21 |

## McGrath et al. Supplemental Tables

| Relevant section of standard | Standard detail                                                                                             | Test location | Test detail                                                                                                                                                                                      | Results/notes                                                                          | Pass/Fail       |
|------------------------------|-------------------------------------------------------------------------------------------------------------|---------------|--------------------------------------------------------------------------------------------------------------------------------------------------------------------------------------------------|----------------------------------------------------------------------------------------|-----------------|
| BS 6.1.3                     | Repeated cleaning and disinfection – does not deteriorate                                                   | MFT           | PAPR units are inspected after 1 week of continual use. Images taken before and after.<br><br>Specification of foam material for yoke details cleaning methods, durability and material fatigue. | Spec sheet and review after 1 week of use.                                             | Pass<br>14/3/21 |
| BS 6.4                       | Ingress protection test for 10 test subjects – using either or both methods (bitter and/or particulometer). | MFT           | 10 users will undergo fit testing with particulometer.                                                                                                                                           | Fit test data shared with EBME team. All fit factors >500 as per BS EN 12941 standard. | Pass<br>25/2/21 |
| ER 3.10.2                    | Appropriate protection to eye and skin irritants                                                            | MFT           |                                                                                                                                                                                                  |                                                                                        |                 |

McGrath et al. Supplemental Tables

| Relevant section of standard | Standard detail                                                                                                                                                                                                                                                                                                                                                               | Test location | Test detail                                                                                                                                           | Results/notes                                                                                                                                                           | Pass/Fail       |
|------------------------------|-------------------------------------------------------------------------------------------------------------------------------------------------------------------------------------------------------------------------------------------------------------------------------------------------------------------------------------------------------------------------------|---------------|-------------------------------------------------------------------------------------------------------------------------------------------------------|-------------------------------------------------------------------------------------------------------------------------------------------------------------------------|-----------------|
| BS 6.2 (6.4)                 | <p>Repeated after hood/yoke is conditioned at maximum specified temperature and humidity.</p> <p>Complete unit is stored for 72 +/- 1 hours at the upper extreme of temperature and humidity specified by the manufacturer. Unit is allowed to return to ambient conditions for 4 hours, then stored for 72 +/- 1 hours at the lower extreme of temperature and humidity.</p> | MFT           | Unit is subjected to particulometer fit testing after appropriate temperature conditioning.                                                           | <p><i>Conditioning beyond use on the ICU should not be required for the MFT in-house evaluation</i></p> <p>All fit tests took place on the Acute ICU at Wythenshawe</p> | Pass<br>25/2/21 |
| BS 6.5                       | Positive pressure inside the hood remains below 5mbar                                                                                                                                                                                                                                                                                                                         | MFT           | 1 user and 1 dummy test head setup. Pressure measurement inside hood during regular use.                                                              | Measured pressure below 5mBar                                                                                                                                           | Pass<br>14/3/21 |
| BS 6.6.2                     | <p>Exceeds manufacturer's minimum specified airflow for a period of at least 4 hours.</p> <p>(The UK/EU regs do not specify a minimal flow. US regulations do, but this is not immediately relevant)</p>                                                                                                                                                                      | MFT, INSPEC   | <p>Test head and flow meter.</p> <p><i>Note the flow meter arrangement is slightly complex as the measurement itself can interfere with flow.</i></p> | Breathe Safety report reviewed.                                                                                                                                         | Pass<br>25/2/21 |

## McGrath et al. Supplemental Tables

| Relevant section of standard | Standard detail                                                                                                                                                                                                                                                                                                                      | Test location | Test detail                                                                                                                                | Results/notes                   | Pass/Fail       |
|------------------------------|--------------------------------------------------------------------------------------------------------------------------------------------------------------------------------------------------------------------------------------------------------------------------------------------------------------------------------------|---------------|--------------------------------------------------------------------------------------------------------------------------------------------|---------------------------------|-----------------|
| BS 6.7                       | Check function of minimum airflow indicator.                                                                                                                                                                                                                                                                                         | MFT, INSPEC   | Apply different flow rates to the yoke measured by external flow meter and evaluate performance of the minimum airflow indicator in units. | Breathe Safety report reviewed. | Pass<br>25/2/21 |
| EN 143<br>BS 6.8             | Clogging of filter                                                                                                                                                                                                                                                                                                                   | MFT, INSPEC   | Flow through filter and yoke tested after 4 hours of use with an external flow meter.                                                      | Breathe Safety report reviewed. | Pass<br>25/2/21 |
| 6.13                         | <p>The carbon dioxide content of the inhalation air (dead space inside the hood) shall not exceed an average of 1% by volume.</p> <p>There is a specific test-rig setup for this. A physiological surrogate model should provide adequate assurance that the CO<sub>2</sub> content inside the hood is &lt;1% during normal use.</p> | MFT, INSPEC   | Oxygen and carbon dioxide (gas analysis) inside the hood measured as partial pressures and/or percentages using MFT EBME equipment.        | Breathe Safety report reviewed. | Pass<br>25/2/21 |

McGrath et al. Supplemental Tables

| Relevant section of standard | Standard detail                                                                                                                                                                                                                                                                                                                                                                    | Test location | Test detail                                                                                                         | Results/notes                                                                                                                          | Pass/Fail       |
|------------------------------|------------------------------------------------------------------------------------------------------------------------------------------------------------------------------------------------------------------------------------------------------------------------------------------------------------------------------------------------------------------------------------|---------------|---------------------------------------------------------------------------------------------------------------------|----------------------------------------------------------------------------------------------------------------------------------------|-----------------|
| BS 6.15                      | <p>Exhalation means (valve) maximum flowrate and safe operation:</p> <p>Hood performs adequately during normal use. Specifically; exhalation means:</p> <ul style="list-style-type: none"> <li>• functions and can be replaced (new hood)</li> <li>• functions in orientations encountered during normal use</li> <li>• is protected against dirt and mechanical damage</li> </ul> | MFT           | <p>Test subject wears hood.</p> <p>Eventually, this section is supplemented with reports from staff evaluation.</p> | Review of initial feedback from users in sim setting                                                                                   | Pass<br>14/3/21 |
| BS 6.15                      | <p>Exhalation means (valve) maximum flowrate and safe operation:</p> <p>Continuous flow rate of 300 +/- 15 L/min is applied for a period of 60+/- 6 secs.</p>                                                                                                                                                                                                                      | MFT           | <p>Flow generator (ventilator) and flow meter.</p> <p>Visual inspection of exhalation valve.</p>                    | <p>Opinion of EBME team. The flow generator works as described with the test flowmeter supplied. Exhalation Valve inspection pass.</p> | Pass<br>14/3/21 |

## McGrath et al. Supplemental Tables

**Table S3. (Supplemental). Pilot data. Q14 & Q17 are Likert Scale items (rated 1-7) and Q8-11 are Visual Analogue Scale items (rated 0-100).**

|             | Current PPE            |                           |                                      |                                 |                                        |                                | BUBBLE-PAPR            |                           |                                      |                                 |                                     |                                   |
|-------------|------------------------|---------------------------|--------------------------------------|---------------------------------|----------------------------------------|--------------------------------|------------------------|---------------------------|--------------------------------------|---------------------------------|-------------------------------------|-----------------------------------|
|             | Q14<br>Safe to<br>wear | Q17<br>Comfort<br>to wear | Q8 Speak<br>clearly to<br>colleagues | Q9 Be<br>heard by<br>colleagues | Q10<br>Speak<br>clearly to<br>patients | Q11 Be<br>heard by<br>patients | Q14<br>Safe to<br>wear | Q17<br>Comfort<br>to wear | Q8 Speak<br>clearly to<br>colleagues | Q9 Be<br>heard by<br>colleagues | Q10 Speak<br>clearly to<br>patients | Q11 Be<br>heard<br>by<br>patients |
| Participant |                        |                           |                                      |                                 |                                        |                                |                        |                           |                                      |                                 |                                     |                                   |
| 1           | 3                      | 3                         | 10                                   | 20                              | 0                                      | 0                              | 4                      | 5                         | 75                                   | 75                              | 80                                  | 80                                |
| 2           | 4                      | 2                         | 15                                   | 20                              | 10                                     | 30                             | 7                      | 5                         | 85                                   | 80                              | 60                                  | 70                                |
| 3           | 4                      | 4                         | 20                                   | 20                              | 30                                     | 30                             | 5                      | 6                         | 90                                   | 90                              | 90                                  | 90                                |
| 4           | 5                      | 2                         | 25                                   | 25                              | 10                                     | 10                             | 6                      | 6                         | 95                                   | 95                              | 95                                  | 85                                |
| 5           | 5                      | 4                         | 33                                   | 40                              | 25                                     | 25                             | 6                      | 5                         | 75                                   | 70                              | 85                                  | 90                                |
| 6           | 6                      | 3                         | 30                                   | 25                              | 30                                     | 30                             | 6                      | 5                         | 65                                   | 70                              | 55                                  | 66                                |
| 7           | 7                      | 2                         | 20                                   | 30                              | 25                                     | 25                             | 7                      | 5                         | 70                                   | 70                              | 65                                  | 65                                |
| 8           | 4                      | 3                         | 45                                   | 50                              | 20                                     | 30                             | 7                      | 6                         | 90                                   | 95                              | 90                                  | 90                                |
| Mean        | 4.8                    | 2.9                       | 24.8                                 | 28.8                            | 18.8                                   | 22.5                           | 6.0                    | 5.4                       | 80.6                                 | 80.6                            | 77.5                                | 79.5                              |
| SD          | 1.3                    | 0.8                       | 11.1                                 | 10.9                            | 10.9                                   | 11.3                           | 1.1                    | 0.5                       | 10.8                                 | 11.2                            | 15.4                                | 11.0                              |



**Table S4. (Supplemental) Fit testing data from the first 10 participants.**

Test protocol HSE INDG 479. Pass level set at a fit factor of 500.

| Subject            | Self-reported height | Self-reported weight | BMI  | Normal Breathing 1 | Deep Breathing | Head Side to Side | Head Up and Down | Talking      | Bending at the waist | Normal Breathing 2 | Overall Fit Factor |
|--------------------|----------------------|----------------------|------|--------------------|----------------|-------------------|------------------|--------------|----------------------|--------------------|--------------------|
| <b>1</b>           | 1.86                 | 74                   | 21.4 | 79705              | 43647          | 125478            | 11125            | 107899       | 1339                 | 76152              | <b>7757</b>        |
| <b>2</b>           | 1.95                 | 75                   | 19.7 | 53792              | 52343          | 59440             | 51673            | 52733        | 50433                | 45961              | <b>52075</b>       |
| <b>3</b>           | NR                   | NR                   | NR   | 38867              | 36699          | 37097             | 41474            | 39500        | 36884                | 37465              | <b>38217</b>       |
| <b>4</b>           | 1.82                 | 65                   | 19.6 | 17745              | 6622           | 3149              | 5028             | 31996        | 30520                | 31326              | <b>8539</b>        |
| <b>5</b>           | 1.65                 | 55                   | 20.2 | 24945              | 25215          | 3885              | 8097             | 28877        | 29107                | 24393              | <b>12268</b>       |
| <b>6</b>           | 1.67                 | 58                   | 20.8 | 24617              | 25608          | 25581             | 25225            | 20107        | 1924                 | 23517              | <b>9088</b>        |
| <b>7</b>           | 1.52                 | 47                   | 20.3 | 28747              | 30700          | 33203             | 15275            | 31671        | 8327                 | 26041              | <b>19829</b>       |
| <b>8</b>           | 1.65                 | 65                   | 23.9 | 27282              | 31318          | 34900             | 9697             | 29093        | 3514                 | 25770              | <b>12544</b>       |
| <b>9</b>           | 1.83                 | 115                  | 34.3 | 11182              | 1123           | 11028             | 24524            | 24692        | 2537                 | 23704              | <b>4408</b>        |
| <b>10</b>          | 1.59                 | 75                   | 29.7 | 25760              | 3419           | 16125             | 2433             | 25523        | 1552                 | 26154              | <b>4588</b>        |
|                    |                      |                      |      |                    |                |                   |                  |              |                      |                    |                    |
| <b>Mean values</b> |                      |                      |      | <b>33264</b>       | <b>25669</b>   | <b>34989</b>      | <b>19455</b>     | <b>39209</b> | <b>16614</b>         | <b>34048</b>       | <b>16931</b>       |
